# Supplementary material for: Identifying Features of a System of Practice to Inform a Contemporary Competency Framework for Paramedics in Canada
Source: MDPI journal article supplement (doi:10.3390/healthcare12090946), 2024-05-05
Supplement: s1 [file s1]

## Supplementary File S1 - Diagramming

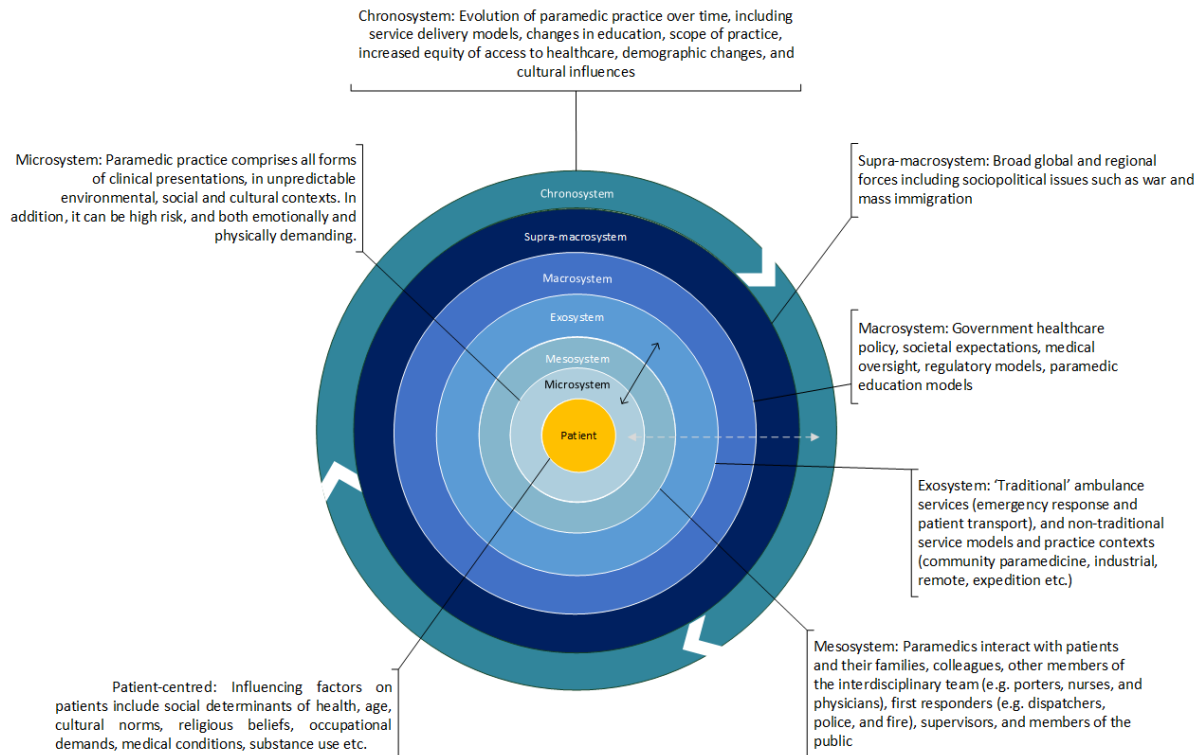

Figure S1. Onion diagram of the system levels of paramedic practice in Canada



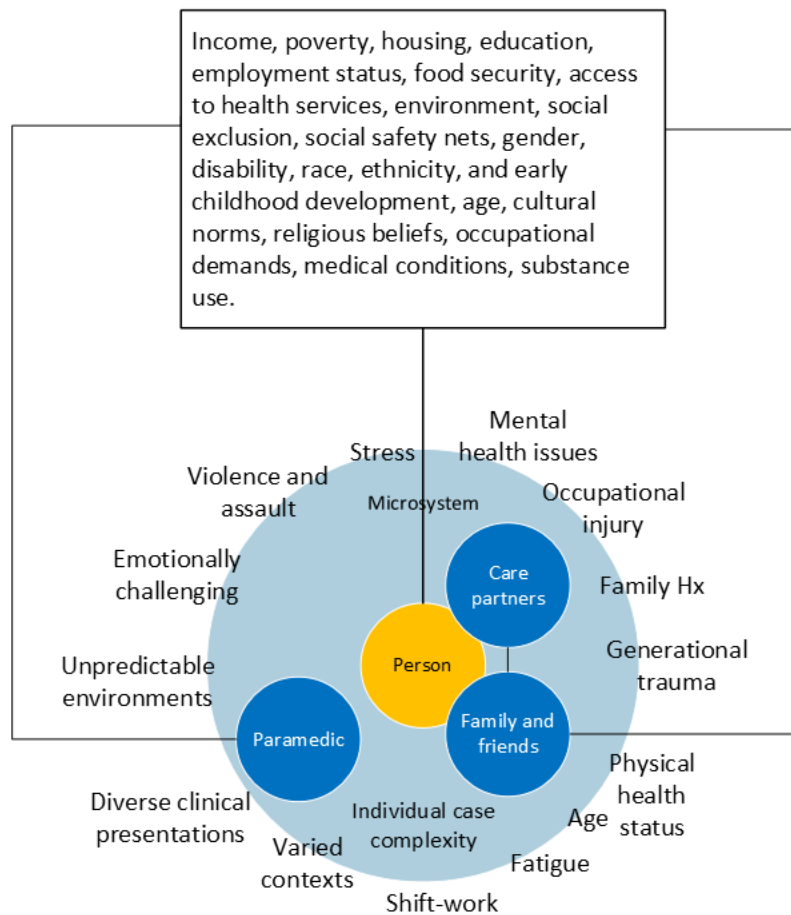

Figure S4. Microsystem details.

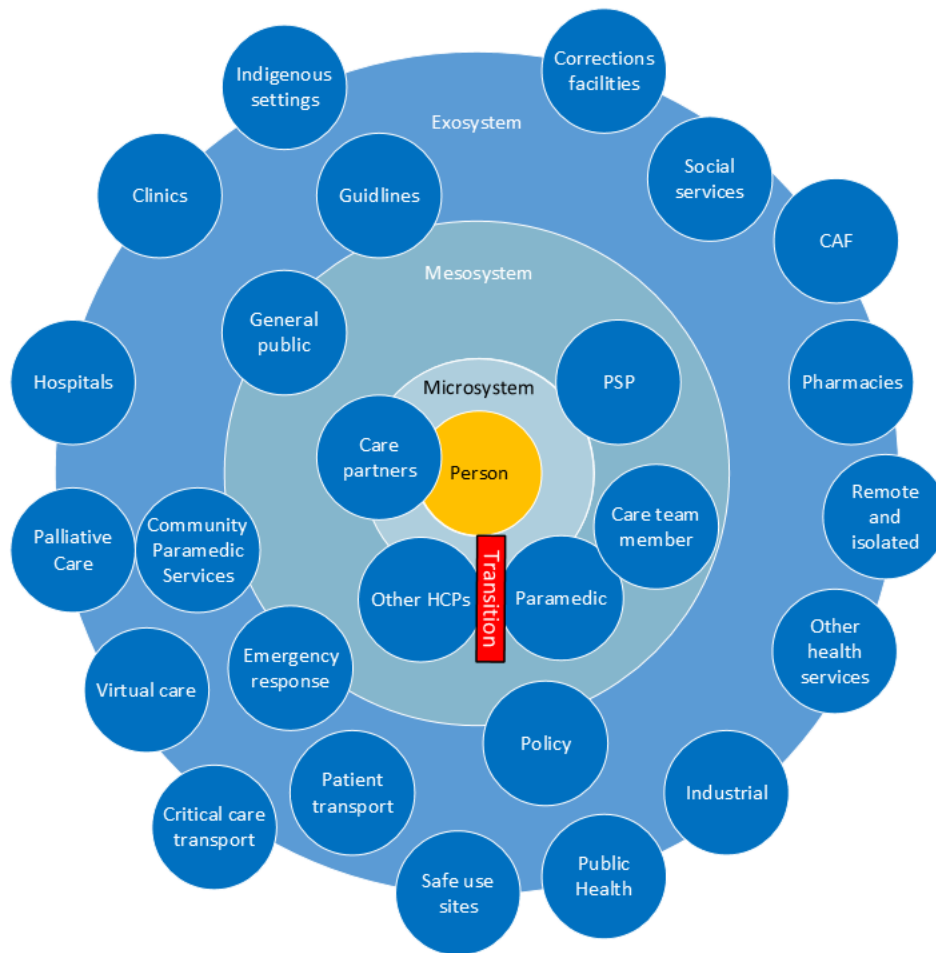

Figure S5. Mesosystem and exosystem details.

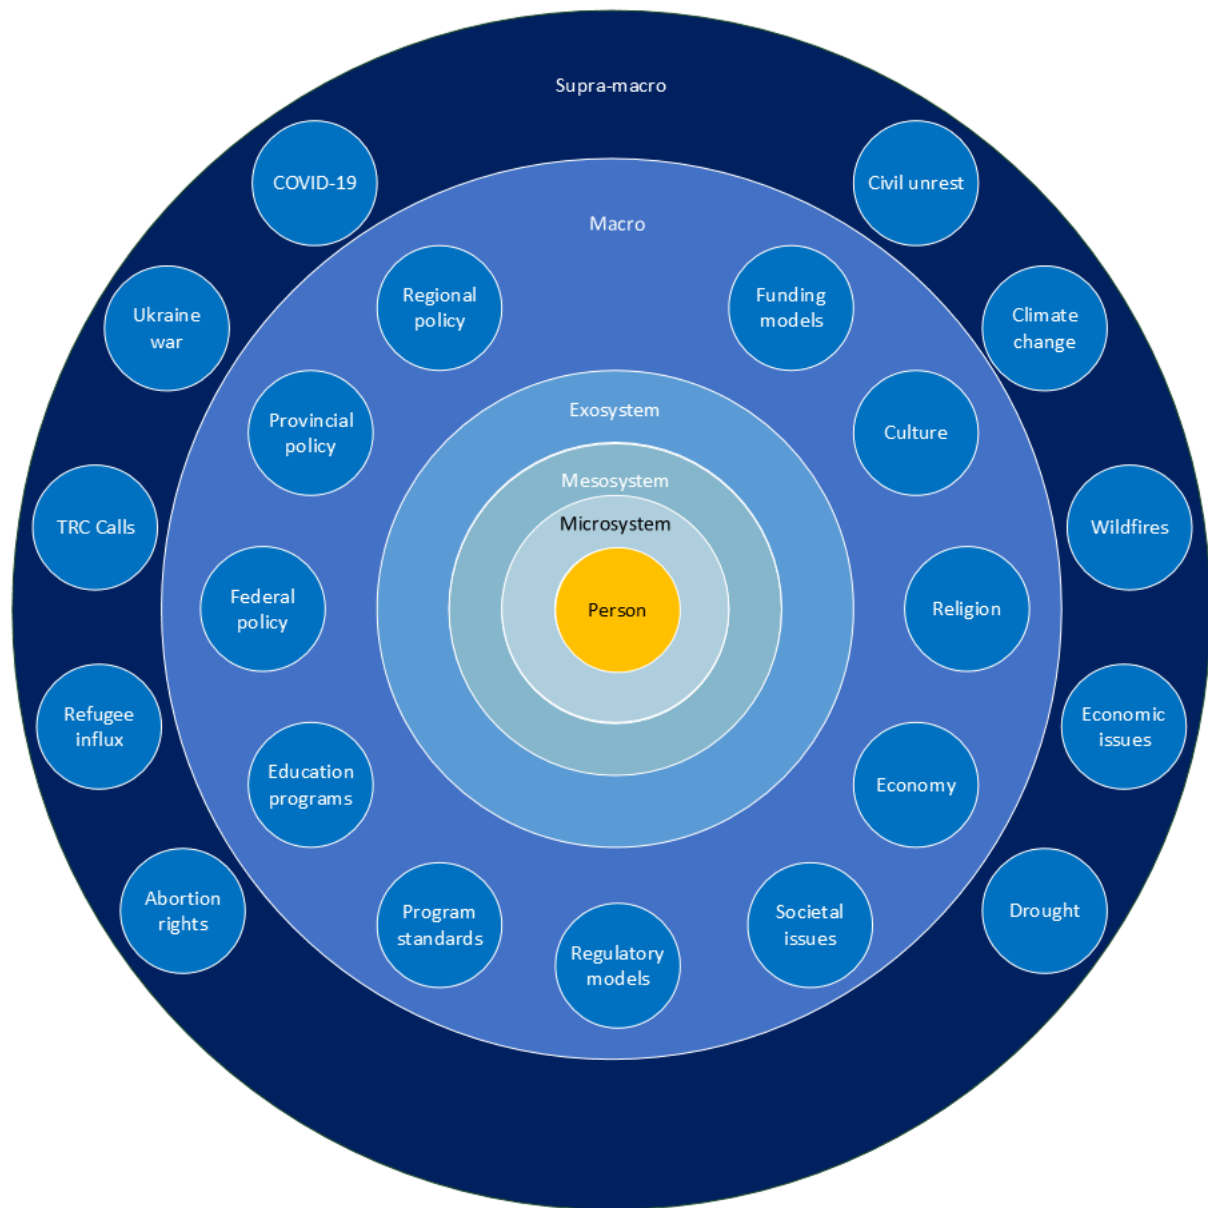

Figure S6. Macrosystem and supramacrosystem details.
